# Supplementary material
Source: HighWire-hosted journal article supplement (https://drc.bmj.com/content/suppl/2021/01/17/9.1.e001813)
Supplement: bmjdrc-2020-001813supp003_data_supplement.pdf [file bmjdrc-2020-001813supp003_data_supplement.pdf]

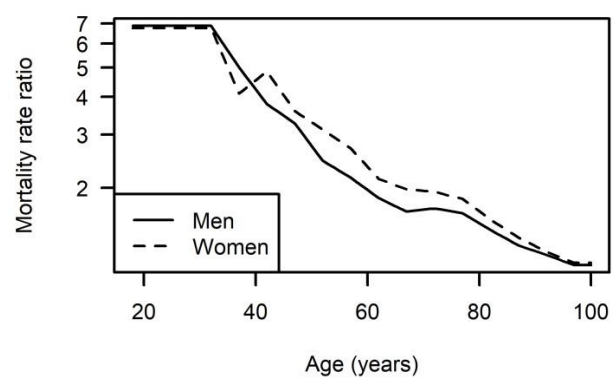

**Figure S2. Age-specific mortality rate ratio of people with type 2 diabetes compared to people without type 2 diabetes. Figure based on data from the national diabetes surveillance.<sup>8</sup>**
